# Supplementary material for: Soy Improves Cardiometabolic Health and Cecal Microbiota in Female Low-Fit Rats
Source: PubMed Central journal article supplement (PMC5569109; doi:10.1038/s41598-017-08965-0), 2017-08-23
Supplement: 41598_2017_8965_MOESM1_ESM.pdf [file 41598_2017_8965_MOESM1_ESM.pdf]

## Soy Improves Cardiometabolic Health and Cecal Microbiota in Female Low-Fit Rats

Tzu-Wen L. Cross<sup>1,2</sup>, Terese M. Zidon<sup>3</sup>, Rebecca J. Welly<sup>3</sup>, Young-Min Park<sup>3</sup>, Steven L. Britton<sup>7,8</sup>, Lauren G. Koch<sup>7</sup>, George E. Rottinghaus<sup>4</sup>, Maria R. Cattai de Godoy<sup>1,2</sup>, Jaime Padilla<sup>3,5,6</sup>, Kelly S. Swanson<sup>1,2</sup>, Victoria J. Vieira-Potter<sup>3\*</sup>

**Supplementary Table 1. Bacterial phyla, families, and genera of fecal samples of ovariectomized (OVX) vs. sham-operated (SHM) rats bred for low aerobic capacity fed either a soy-rich (Soy) or soy-free (Control) diet.** Values are least-squared means  $\pm$  SEM, n = 8-10/group. Means in a row without a common superscript letter differ,  $P < 0.05$ .

| Phylum            | Family                         | Genus                        | Soy                                            |                                               | Control                                        |                                               | P values        |                 |              |
|-------------------|--------------------------------|------------------------------|------------------------------------------------|-----------------------------------------------|------------------------------------------------|-----------------------------------------------|-----------------|-----------------|--------------|
|                   |                                |                              | OVX                                            | SHM                                           | OVX                                            | SHM                                           | Diet            | Surgery         | Diet*Surgery |
| <b>Firmicutes</b> |                                |                              | <b>65.0 <math>\pm</math> 1.75</b>              | <b>63.7 <math>\pm</math> 1.75</b>             | <b>67.8 <math>\pm</math> 1.96</b>              | <b>71.3 <math>\pm</math> 1.75</b>             | <b>&lt;0.01</b> | <b>0.54</b>     | <b>0.20</b>  |
|                   | <i>Undefined Clostridiales</i> | <i>Undefined</i>             | 21.9 $\pm$ 2.04                                | 27.9 $\pm$ 2.04                               | 28.6 $\pm$ 2.28                                | 29.5 $\pm$ 2.04                               | 0.05            | 0.11            | 0.24         |
|                   | <i>Ruminococcaceae</i>         |                              | 18.9 $\pm$ 1.44                                | 16.5 $\pm$ 1.44                               | 16.8 $\pm$ 1.61                                | 16.2 $\pm$ 1.44                               | 0.42            | 0.32            | 0.57         |
|                   |                                | <i>Undefined</i>             | 6.95 $\pm$ 0.55                                | 6.90 $\pm$ 0.55                               | 6.06 $\pm$ 0.61                                | 5.70 $\pm$ 0.55                               | 0.07            | 0.72            | 0.77         |
|                   |                                | <i>Oscillospira</i>          | 6.13 $\pm$ 0.76                                | 6.18 $\pm$ 0.76                               | 7.19 $\pm$ 0.85                                | 6.50 $\pm$ 0.76                               | 0.38            | 0.68            | 0.64         |
|                   |                                | <i>Ruminococcus</i>          | 5.78 $\pm$ 0.72                                | 3.42 $\pm$ 0.72                               | 3.53 $\pm$ 0.80                                | 3.96 $\pm$ 0.72                               | 0.26            | 0.20            | 0.07         |
|                   | <i>Lactobacillaceae</i>        | <i>Lactobacillus</i>         | 10.9 $\pm$ 2.77                                | 6.46 $\pm$ 2.77                               | 8.24 $\pm$ 3.10                                | 8.88 $\pm$ 2.77                               | 0.43            | 0.40            | 0.67         |
|                   | <i>Lachnospiraceae</i>         |                              | 5.86 $\pm$ 0.80                                | 6.26 $\pm$ 0.80                               | 5.56 $\pm$ 0.90                                | 4.30 $\pm$ 0.80                               | 0.18            | 0.60            | 0.32         |
|                   |                                | <i>Undefined</i>             | <b>2.62 <math>\pm</math> 0.48</b>              | <b>4.15 <math>\pm</math> 0.48</b>             | <b>1.99 <math>\pm</math> 0.54</b>              | <b>1.74 <math>\pm</math> 0.48</b>             | <b>&lt;0.01</b> | <b>0.21</b>     | <b>0.08</b>  |
|                   |                                | <i>Anaerostipes</i>          | <b>0.03 <math>\pm</math> 0.01</b>              | <b>0.05 <math>\pm</math> 0.01</b>             | <b>0.08 <math>\pm</math> 0.01</b>              | <b>0.07 <math>\pm</math> 0.01</b>             | <b>&lt;0.01</b> | <b>0.50</b>     | <b>0.14</b>  |
|                   |                                | <i>Coprococcus</i>           | 1.91 $\pm$ 0.51                                | 0.75 $\pm$ 0.51                               | 2.43 $\pm$ 0.57                                | 1.72 $\pm$ 0.51                               | 0.16            | 0.08            | 0.67         |
|                   |                                | <i>Dorea</i>                 | <b>0.13 <math>\pm</math> 0.03<sup>ab</sup></b> | <b>0.30 <math>\pm</math> 0.03<sup>a</sup></b> | <b>0.07 <math>\pm</math> 0.04<sup>b</sup></b>  | <b>0.06 <math>\pm</math> 0.03<sup>b</sup></b> | <b>&lt;0.01</b> | <b>0.03</b>     | <b>0.02</b>  |
|                   |                                | <i>Roseburia</i>             | <b>0.01 <math>\pm</math> 0.01</b>              | <b>0.01 <math>\pm</math> 0.01</b>             | <b>0.04 <math>\pm</math> 0.01</b>              | <b>0.03 <math>\pm</math> 0.01</b>             | <b>&lt;0.01</b> | <b>0.90</b>     | <b>0.46</b>  |
|                   |                                | [ <i>Ruminococcus</i> ]      | 1.16 $\pm$ 0.19                                | 0.99 $\pm$ 0.19                               | 0.96 $\pm$ 0.21                                | 0.68 $\pm$ 0.19                               | 0.20            | 0.28            | 0.78         |
|                   | <i>Veillonellaceae</i>         |                              | 2.44 $\pm$ 0.19                                | 1.99 $\pm$ 0.19                               | 2.24 $\pm$ 0.22                                | 1.95 $\pm$ 0.19                               | 0.55            | 0.07            | 0.67         |
|                   |                                | <i>Undefined</i>             | 1.88 $\pm$ 0.23                                | 1.56 $\pm$ 0.23                               | 2.11 $\pm$ 0.25                                | 1.91 $\pm$ 0.23                               | 0.22            | 0.28            | 0.78         |
|                   |                                | <i>Anaerovibrio</i>          | <b>0.30 <math>\pm</math> 0.05</b>              | <b>0.12 <math>\pm</math> 0.05</b>             | <b>0.09 <math>\pm</math> 0.06</b>              | <b>0.03 <math>\pm</math> 0.05</b>             | <b>&lt;0.01</b> | <b>0.02</b>     | <b>0.27</b>  |
|                   |                                | <i>Phascolarctobacterium</i> | 0.06 $\pm$ 0.10                                | 0.30 $\pm$ 0.10                               | 0.00 $\pm$ 0.11                                | 0.00 $\pm$ 0.10                               | 0.09            | 0.25            | 0.26         |
|                   |                                | <i>Veillonella</i>           | 0.21 $\pm$ 0.10                                | 0.01 $\pm$ 0.10                               | 0.04 $\pm$ 0.12                                | 0.01 $\pm$ 0.10                               | 0.45            | 0.29            | 0.45         |
|                   | <i>Clostridiaceae</i>          |                              | <b>2.20 <math>\pm</math> 1.08</b>              | <b>2.32 <math>\pm</math> 1.08</b>             | <b>3.50 <math>\pm</math> 1.21</b>              | <b>6.94 <math>\pm</math> 1.08</b>             | <b>0.01</b>     | <b>0.12</b>     | <b>0.15</b>  |
|                   |                                | <i>Undefined</i>             | <b>0.64 <math>\pm</math> 0.36<sup>b</sup></b>  | <b>0.12 <math>\pm</math> 0.36<sup>b</sup></b> | <b>0.87 <math>\pm</math> 0.40<sup>ab</sup></b> | <b>2.33 <math>\pm</math> 0.36<sup>a</sup></b> | <b>&lt;0.01</b> | <b>0.22</b>     | <b>0.01</b>  |
|                   |                                | <i>Clostridium</i>           | 0.76 $\pm$ 0.33                                | 0.04 $\pm$ 0.33                               | 0.57 $\pm$ 0.37                                | 0.01 $\pm$ 0.33                               | 0.74            | 0.07            | 0.80         |
|                   |                                | <i>SMB53</i>                 | <b>0.80 <math>\pm</math> 0.67</b>              | <b>2.17 <math>\pm</math> 0.67</b>             | <b>2.06 <math>\pm</math> 0.75</b>              | <b>4.60 <math>\pm</math> 0.67</b>             | <b>0.01</b>     | <b>&lt;0.01</b> | <b>0.40</b>  |
|                   | <i>Streptococcaceae</i>        | <i>Streptococcus</i>         | <b>0.94 <math>\pm</math> 0.21</b>              | <b>0.89 <math>\pm</math> 0.21</b>             | <b>0.53 <math>\pm</math> 0.24</b>              | <b>0.29 <math>\pm</math> 0.21</b>             | <b>0.02</b>     | <b>0.21</b>     | <b>0.77</b>  |

|                       |                                |                        |                                |                                |                                |                                 |                 |                 |                 |
|-----------------------|--------------------------------|------------------------|--------------------------------|--------------------------------|--------------------------------|---------------------------------|-----------------|-----------------|-----------------|
|                       | <i>[Mogibacteriaceae]</i>      | <i>Undefined</i>       | 0.88 ± 0.25                    | 0.66 ± 0.25                    | 0.79 ± 0.28                    | 1.30 ± 0.25                     | 0.30            | 0.59            | 0.17            |
|                       | <i>Turicibacteraceae</i>       | <i>Turicibacter</i>    | 0.41 ± 0.13                    | 0.28 ± 0.13                    | 0.34 ± 0.15                    | 0.56 ± 0.13                     | 0.43            | 0.74            | 0.20            |
|                       | <i>Enterococcaceae</i>         | <i>Enterococcus</i>    | 0.25 ± 0.12                    | 0.00 ± 0.12                    | 0.00 ± 0.14                    | 0.00 ± 0.12                     | 0.35            | 0.35            | 0.35            |
|                       | <i>Peptococcaceae</i>          |                        | 0.22 ± 0.04                    | 0.32 ± 0.04                    | 0.22 ± 0.04                    | 0.28 ± 0.04                     | 0.61            | 0.07            | 0.63            |
|                       |                                | <i>Undefined</i>       | 0.11 ± 0.03                    | 0.16 ± 0.03                    | 0.15 ± 0.03                    | 0.21 ± 0.03                     | 0.13            | 0.05            | 0.93            |
|                       |                                | <b>rc4-4</b>           | <b>0.11 ± 0.03</b>             | <b>0.16 ± 0.03</b>             | <b>0.07 ± 0.03</b>             | <b>0.07 ± 0.03</b>              | <b>0.02</b>     | <b>0.47</b>     | <b>0.41</b>     |
|                       | <i>Peptostreptococcaceae</i>   | <i>Undefined</i>       | 0.14 ± 0.26                    | 0.20 ± 0.26                    | 0.80 ± 0.30                    | 0.49 ± 0.26                     | 0.09            | 0.66            | 0.49            |
|                       | <i>Erysipelotrichaceae</i>     | <i>Allobaculum</i>     | 0.04 ± 0.22                    | 0.01 ± 0.22                    | 0.26 ± 0.25                    | 0.59 ± 0.22                     | 0.09            | 0.51            | 0.42            |
| <b>Bacteroidetes</b>  |                                |                        | <b>25.3 ± 1.61</b>             | <b>25.5 ± 1.61</b>             | <b>14.95 ± 1.80</b>            | <b>14.6 ± 1.61</b>              | <b>&lt;0.01</b> | <b>0.95</b>     | <b>0.86</b>     |
|                       | <i>Prevotellaceae</i>          |                        | <b>14.3 ± 1.52</b>             | <b>14.7 ± 1.52</b>             | <b>4.05 ± 1.70</b>             | <b>3.46 ± 1.52</b>              | <b>&lt;0.01</b> | <b>0.95</b>     | <b>0.75</b>     |
|                       |                                | <i>Undefined</i>       | <b>0.15 ± 0.03</b>             | <b>0.08 ± 0.03</b>             | <b>0.00 ± 0.03</b>             | <b>0.00 ± 0.03</b>              | <b>&lt;0.01</b> | <b>0.22</b>     | <b>0.24</b>     |
|                       |                                | <i>Prevotella</i>      | <b>14.1 ± 1.51</b>             | <b>14.6 ± 1.51</b>             | <b>4.05 ± 1.69</b>             | <b>3.45 ± 1.51</b>              | <b>&lt;0.01</b> | <b>0.97</b>     | <b>0.74</b>     |
|                       | <i>S24-7</i>                   | <i>Undefined</i>       | <b>7.07 ± 0.48</b>             | <b>8.85 ± 0.48</b>             | <b>7.39 ± 0.54</b>             | <b>8.34 ± 0.48</b>              | <b>0.85</b>     | <b>&lt;0.01</b> | <b>0.41</b>     |
|                       | <i>[Paraprevotellaceae]</i>    |                        | <b>2.23 ± 0.25</b>             | <b>1.05 ± 0.25</b>             | <b>1.26 ± 0.28</b>             | <b>1.09 ± 0.25</b>              | <b>0.09</b>     | <b>0.01</b>     | <b>0.06</b>     |
|                       |                                | <i>CF231</i>           | <b>0.20 ± 0.06</b>             | <b>0.16 ± 0.06</b>             | <b>0.43 ± 0.07</b>             | <b>0.43 ± 0.06</b>              | <b>&lt;0.01</b> | <b>0.77</b>     | <b>0.84</b>     |
|                       |                                | <i>Paraprevotella</i>  | 0.77 ± 0.20                    | 0.00 ± 0.20                    | 0.00 ± 0.23                    | 0.00 ± 0.20                     | 0.08            | 0.08            | 0.08            |
|                       |                                | <i>[Prevotella]</i>    | 1.26 ± 0.23                    | 0.88 ± 0.23                    | 0.83 ± 0.26                    | 0.66 ± 0.23                     | 0.17            | 0.26            | 0.64            |
|                       | <i>Bacteroidaceae</i>          | <i>Bacteroides</i>     | 0.97 ± 0.33                    | 0.55 ± 0.33                    | 1.26 ± 0.37                    | 0.44 ± 0.33                     | 0.80            | 0.08            | 0.57            |
|                       | <i>Undefined Bacteroidales</i> | <i>Undefined</i>       | <b>0.47 ± 0.10<sup>b</sup></b> | <b>0.11 ± 0.10<sup>b</sup></b> | <b>0.66 ± 0.11<sup>a</sup></b> | <b>0.90 ± 0.10<sup>a</sup></b>  | <b>&lt;0.01</b> | <b>0.56</b>     | <b>&lt;0.01</b> |
|                       | <i>Rikenellaceae</i>           | <i>Undefined</i>       | 0.23 ± 0.03                    | 0.22 ± 0.03                    | 0.25 ± 0.04                    | 0.25 ± 0.03                     | 0.53            | 0.89            | 0.89            |
|                       | <i>[Odoribacteraceae]</i>      | <i>Butyricimonas</i>   | <b>0.04 ± 0.02</b>             | <b>0.03 ± 0.02</b>             | <b>0.08 ± 0.02</b>             | <b>0.07 ± 0.02</b>              | <b>0.04</b>     | <b>0.76</b>     | <b>0.99</b>     |
| <b>Proteobacteria</b> |                                |                        | <b>7.53 ± 0.96<sup>b</sup></b> | <b>11.0 ± 0.96<sup>b</sup></b> | <b>14.7 ± 1.07<sup>a</sup></b> | <b>8.84 ± 0.96<sup>ab</sup></b> | <b>&lt;0.01</b> | <b>0.23</b>     | <b>0.02</b>     |
|                       | <i>Helicobacteraceae</i>       |                        | <b>5.61 ± 0.91</b>             | <b>6.56 ± 0.91</b>             | <b>8.85 ± 1.01</b>             | <b>7.59 ± 0.91</b>              | <b>0.03</b>     | <b>0.87</b>     | <b>0.25</b>     |
|                       |                                | <i>Undefined</i>       | <b>0.25 ± 0.04</b>             | <b>0.30 ± 0.04</b>             | <b>0.41 ± 0.05</b>             | <b>0.35 ± 0.04</b>              | <b>0.03</b>     | <b>0.88</b>     | <b>0.26</b>     |
|                       |                                | <i>Flexispira</i>      | <b>0.18 ± 0.03</b>             | <b>0.22 ± 0.03</b>             | <b>0.29 ± 0.04</b>             | <b>0.27 ± 0.03</b>              | <b>0.03</b>     | <b>0.78</b>     | <b>0.39</b>     |
|                       |                                | <i>Helicobacter</i>    | <b>5.18 ± 0.83</b>             | <b>6.05 ± 0.83</b>             | <b>8.16 ± 0.93</b>             | <b>6.97 ± 0.83</b>              | <b>0.03</b>     | <b>0.86</b>     | <b>0.24</b>     |
|                       | <i>Desulfovibrionaceae</i>     |                        | <b>1.44 ± 0.57</b>             | <b>2.18 ± 0.58</b>             | <b>4.99 ± 0.64</b>             | <b>3.40 ± 0.58</b>              | <b>&lt;0.01</b> | <b>0.48</b>     | <b>0.06</b>     |
|                       |                                | <i>Undefined</i>       | <b>1.28 ± 0.54</b>             | <b>1.95 ± 0.54</b>             | <b>4.60 ± 0.60</b>             | <b>3.08 ± 0.54</b>              | <b>&lt;0.01</b> | <b>0.45</b>     | <b>0.06</b>     |
|                       |                                | <i>Desulfovibrio</i>   | <b>0.16 ± 0.06</b>             | <b>0.23 ± 0.06</b>             | <b>0.39 ± 0.06</b>             | <b>0.32 ± 0.06</b>              | <b>&lt;0.01</b> | <b>0.95</b>     | <b>0.22</b>     |
|                       | <i>Alcaligenaceae</i>          | <i>Sutterella</i>      | 0.37 ± 0.17                    | 0.05 ± 0.17                    | 0.05 ± 0.19                    | 0.00 ± 0.17                     | 0.31            | 0.30            | 0.45            |
|                       | <i>Enterobacteriaceae</i>      | <i>Undefined</i>       | 0.09 ± 0.33                    | 0.04 ± 0.33                    | 0.8 ± 0.37                     | 0.00 ± 0.33                     | 0.32            | 0.22            | 0.28            |
|                       | <i>Pasteurellaceae</i>         | <i>Aggregatibacter</i> | <b>0.02 ± 0.01</b>             | <b>0.01 ± 0.01</b>             | <b>0.02 ± 0.01</b>             | <b>0.00 ± 0.01</b>              | <b>0.57</b>     | <b>0.02</b>     | <b>0.98</b>     |
| <b>Cyanobacteria</b>  | <i>Undefined YS2</i>           | <i>Undefined</i>       | <b>0.81 ± 0.13</b>             | <b>0.88 ± 0.13</b>             | <b>0.49 ± 0.15</b>             | <b>0.34 ± 0.13</b>              | <b>&lt;0.01</b> | <b>0.78</b>     | <b>0.42</b>     |
| <b>Actinobacteria</b> |                                |                        | <b>0.67 ± 0.34</b>             | <b>0.22 ± 0.34</b>             | <b>0.79 ± 0.38</b>             | <b>1.60 ± 0.34</b>              | <b>&lt;0.01</b> | <b>0.44</b>     | <b>0.06</b>     |
|                       | <i>Bifidobacteriaceae</i>      | <i>Bifidobacterium</i> | 0.52 ± 0.34                    | 0.00 ± 0.34                    | 0.45 ± 0.38                    | 1.3 ± 0.34                      | 0.09            | 0.63            | 0.06            |

|                      |                                 |                         |                    |                    |                    |                    |                 |             |             |
|----------------------|---------------------------------|-------------------------|--------------------|--------------------|--------------------|--------------------|-----------------|-------------|-------------|
|                      | <i>Coriobacteriaceae</i>        |                         | <b>0.14 ± 0.03</b> | <b>0.21 ± 0.03</b> | <b>0.33 ± 0.04</b> | <b>0.29 ± 0.03</b> | <b>&lt;0.01</b> | <b>0.72</b> | <b>0.12</b> |
|                      |                                 | <i>Undefined</i>        | <b>0.06 ± 0.02</b> | <b>0.08 ± 0.02</b> | <b>0.14 ± 0.02</b> | <b>0.09 ± 0.02</b> | <b>0.01</b>     | <b>0.59</b> | <b>0.11</b> |
|                      |                                 | <i>Adlercreutzia</i>    | <b>0.09 ± 0.03</b> | <b>0.13 ± 0.03</b> | <b>0.19 ± 0.03</b> | <b>0.19 ± 0.03</b> | <b>&lt;0.01</b> | <b>0.49</b> | <b>0.50</b> |
|                      | <i>Micrococcaceae</i>           | <i>Rothia</i>           | 0.01 ± 0.00        | 0.01 ± 0.00        | 0.01 ± 0.00        | 0.01 ± 0.00        | 0.12            | 0.96        | 0.47        |
| <b>Spirochaetes</b>  | <b><i>Spirochaetaceae</i></b>   | <b><i>Treponema</i></b> | <b>0.50 ± 0.11</b> | <b>0.45 ± 0.11</b> | <b>0.88 ± 0.13</b> | <b>0.73 ± 0.11</b> | <b>&lt;0.01</b> | <b>0.39</b> | <b>0.66</b> |
| Deferribacteres      | <i>Deferribacteraceae</i>       | <i>Mucispirillum</i>    | 0.09 ± 0.04        | 0.11 ± 0.04        | 0.18 ± 0.05        | 0.16 ± 0.04        | 0.10            | 0.98        | 0.58        |
| <b>Elusimicrobia</b> | <b><i>Elusimicrobiaceae</i></b> | <b><i>Undefined</i></b> | <b>0.10 ± 0.02</b> | <b>0.05 ± 0.02</b> | <b>0.03 ± 0.02</b> | <b>0.01 ± 0.02</b> | <b>&lt;0.01</b> | <b>0.10</b> | <b>0.49</b> |
| Verrucomicrobia      | <i>Verrucomicrobiaceae</i>      | <i>Akkermansia</i>      | 0.00 ± 0.09        | 0.16 ± 0.09        | 0.08 ± 0.10        | 0.28 ± 0.09        | 0.06            | 0.27        | 0.85        |
| TM7                  | <i>F16</i>                      | <i>Undefined</i>        | 0.04 ± 0.01        | 0.02 ± 0.01        | 0.04 ± 0.01        | 0.03 ± 0.01        | 0.70            | 0.12        | 0.71        |
| Tenericutes          | <i>Undefined RF39</i>           | <i>Undefined</i>        | 0.01 ± 0.02        | 0.04 ± 0.02        | 0.01 ± 0.02        | 0.01 ± 0.02        | 0.29            | 0.32        | 0.67        |
